# Supplementary material for: Anti-Microbial Activities of Mussel-Derived Recombinant Proteins against Gram-Negative Bacteria
Source: MDPI journal article supplement (doi:10.3390/antibiotics13030239), 2024-03-05
Supplement: s1 [file s1]

## Supporting Information

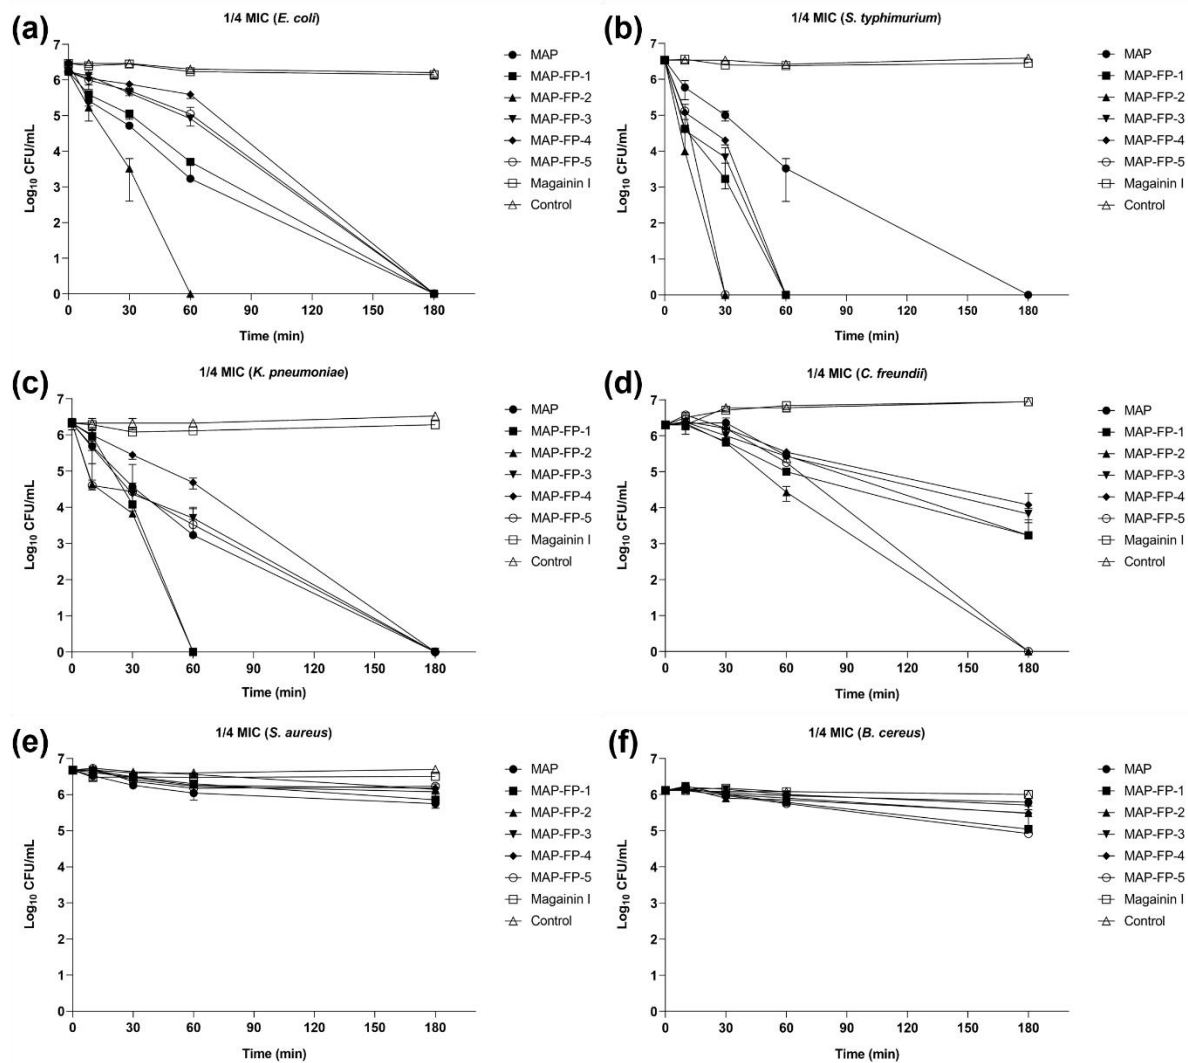

**Figure S1. Time killing kinetics of MAP-FPs 1/4×MIC against Gram-negative and positive bacteria.** Microbials ( $1.0 \times 10^7$  CFU), including *E. coli* (a), *S. typhimurium* (b), *K. pneumoniae* (c), *C. freundii* (d), *S. aureus* (e), and *B. cereus* (f), were treated with 1/4×MIC of MAP-FPs and Magainin I in PBS. After indicated times (10, 30, 60 and 180 min), bacterial was harvested and then spread into agar-plate. After 18 hr incubation, CFU was calculated by counting the number of colonies. All data represent the mean value  $\pm$  standard deviation of three independent experiments.

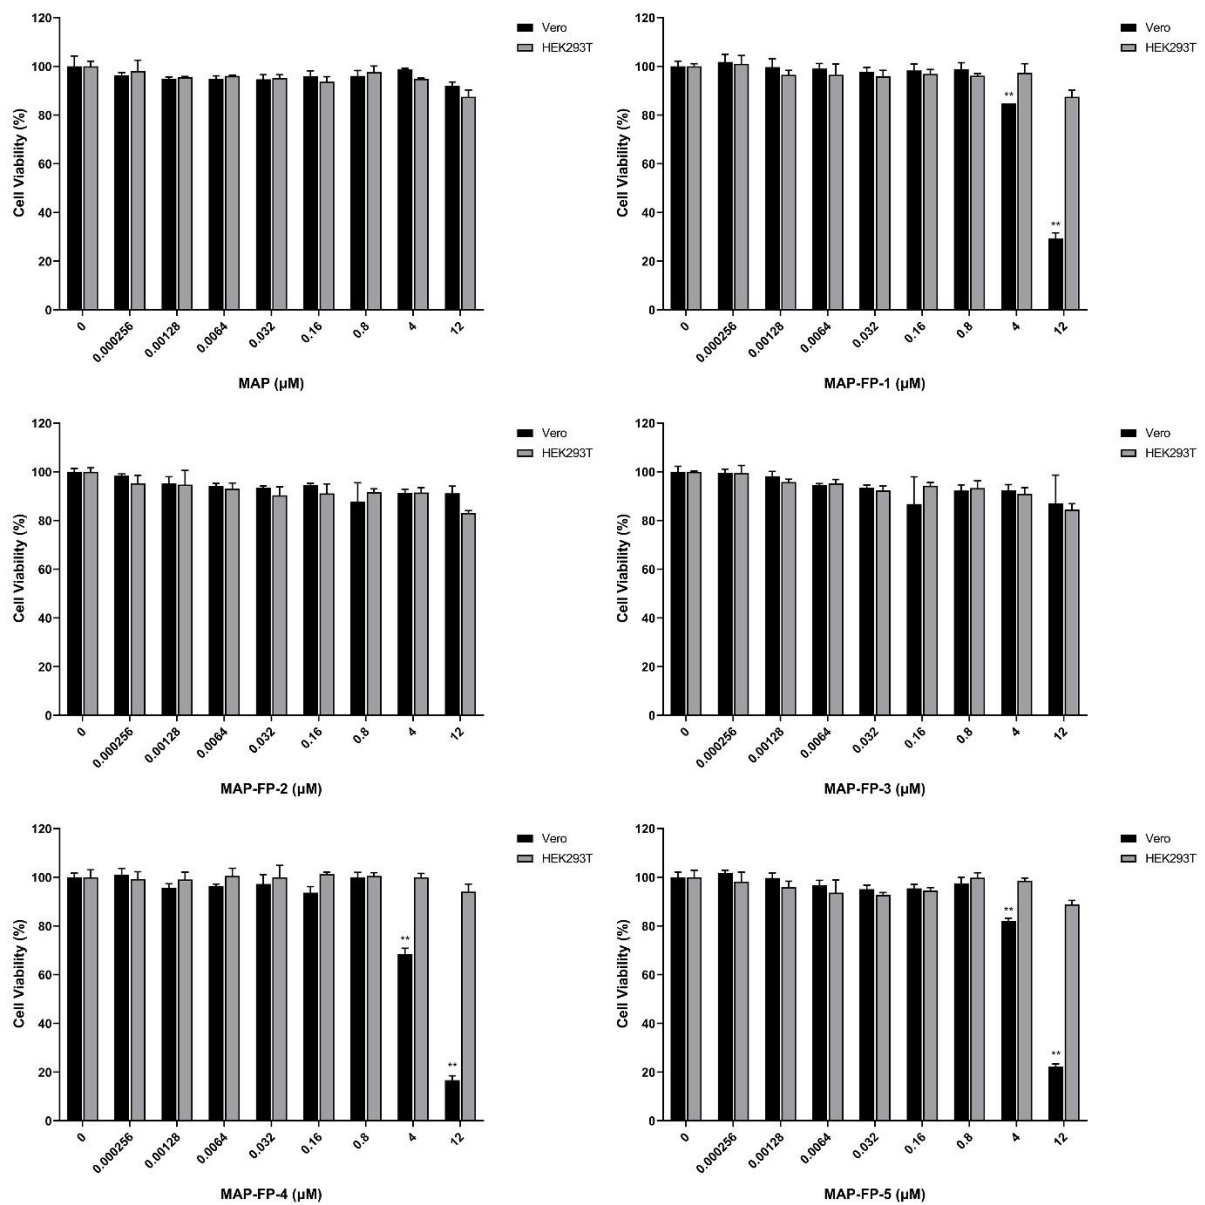

**Figure S2. Cytotoxicity of the MAP-FPs in Vero and HEK293T cells.**

All data represent the mean value  $\pm$  standard deviation of three independent experiments. Data are presented as the mean  $\pm$  standard deviation. \* $p < 0.05$ , \*\* $p < 0.01$
